# Supplementary material for: Production of propionic acid via hydrodeoxygenation of lactic acid over FexOy catalysts
Source: Royal Society of Chemistry journal article supplement (doi:10.1039/c6ra10096a), 2016-01-01
Supplement: c6ra10096a1.pdf [file c6ra10096a1.pdf]

## Supplementary Information

### Production of propionic acid via hydrodeoxygenation of lactic acid over $\text{Fe}_x\text{O}_y$ catalysts- Support Information

Xinli Li, Zhanjie Zhai, Congming Tang,\* Liangwei Sun, Yu Zhang and Wei Bai

**Table S1** BET data of the used catalysts

| Catalyst                     | $S_{\text{BET}}$ ( $\text{m}^2/\text{g}$ ) |
|------------------------------|--------------------------------------------|
| Used Fe                      | 0.24                                       |
| Used FeO                     | 0.30                                       |
| Used $\text{Fe}_3\text{O}_4$ | 53.1                                       |
| Used $\text{Fe}_2\text{O}_3$ | 26.5                                       |

**Table S2**  $\text{H}_2$ -consumption for reduction of catalysts

| Catalyst                      | $\text{H}_2$ -consumption for reduction of catalysts ( $\mu\text{mol H}_2/\text{g}$ ) |                            |
|-------------------------------|---------------------------------------------------------------------------------------|----------------------------|
|                               | Low temperature reduction                                                             | High temperature reduction |
| Fresh $\text{Fe}_2\text{O}_3$ | 84.1                                                                                  | 70.2                       |
| Fresh $\text{Fe}_3\text{O}_4$ | 47.6                                                                                  | 73.8                       |
| Used $\text{Fe}_2\text{O}_3$  | 4.0                                                                                   | 59.5                       |
| Used $\text{Fe}_3\text{O}_4$  | 3.9                                                                                   | 49.3                       |

**Table S3** LA conversion over the catalysts at 360°C.

| Catalysts <sup>a</sup>  | LA conv. (%) | Sel. <sup>b</sup> (%) |      |     |     |     |
|-------------------------|--------------|-----------------------|------|-----|-----|-----|
|                         |              | PA                    | AD   | AA  | PD  | ACA |
| Fe                      | 83.1         | 13.6                  | 13.5 | 1.2 | 1.0 | 1.8 |
| FeO                     | 84.0         | 12.5                  | 14.7 | 1.3 | 0.8 | 1.6 |
| $\text{Fe}_3\text{O}_4$ | 89.5         | 28.6                  | 12.0 | 1.3 | 1.1 | 5.6 |
| $\text{Fe}_2\text{O}_3$ | 90.7         | 28.1                  | 11.7 | 1.2 | 1.0 | 4.1 |

<sup>a</sup> Catalyst: 0.38 mL, Fe, 1.23g, FeO, 0.90g,  $\text{Fe}_3\text{O}_4$ , 0.32g,  $\text{Fe}_2\text{O}_3$ , 0.42 g; carrier gas  $\text{N}_2$ , 1mL/min; feed flow rate 1mL/h, LA feedstock 20wt% ; reaction temperature, 360°C; TOS, 3–4 h. <sup>b</sup> LA: lactic acid, PA: propionic acid, AD: acetaldehyde, AA: acrylic acid, PD: 2,3-pentanedione, ACA: acetic acid.

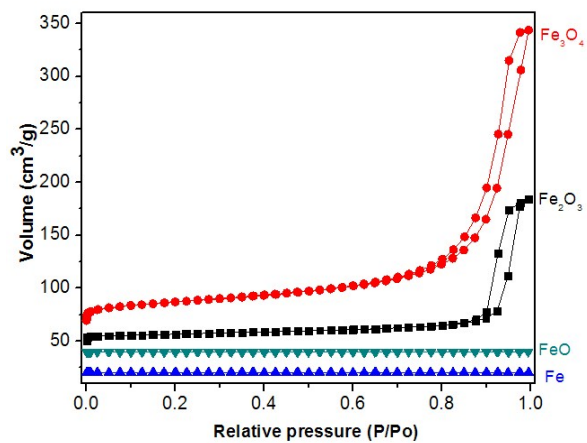

**Figure S1** Adsorption isotherms of catalysts

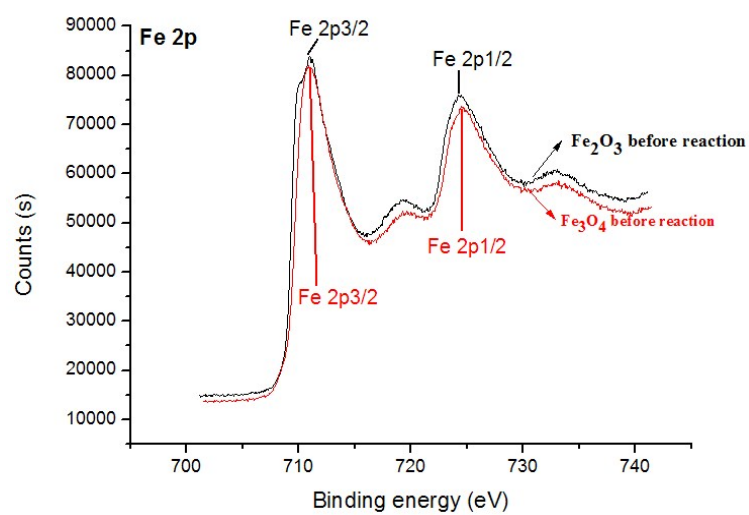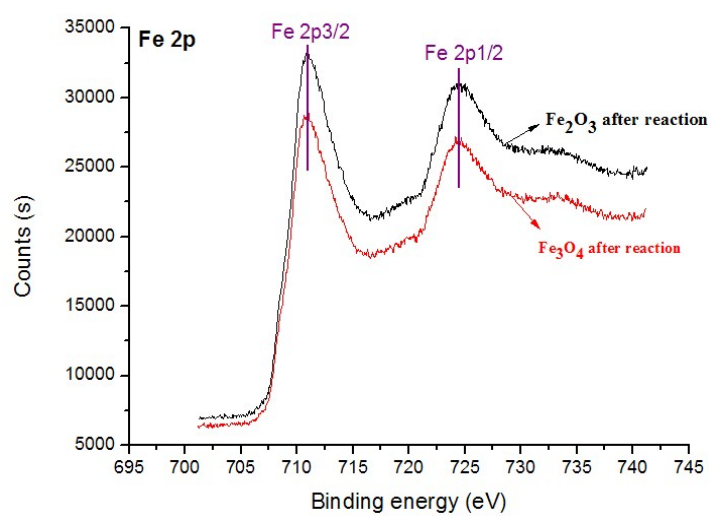

**Figure S2** High-resolution XPS profiles of Fe 2p for the fresh catalysts and their corresponding used catalysts
